# Supplementary material
Source: publisher figshare collection journal article supplement (https://sage.figshare.com/ndownloader/files/14186273)
Supplement: Supplementary file 1 [file 14186273]

**Supplementary Table 4: Functions of Lipids Detected in Fetal Sheep Cerebral  
White Matter by MALDI-MS, Negative Ion Mode**

| <b>Lipid Class</b>                        | <b>Functions</b>                                                                                                                                                       |
|-------------------------------------------|------------------------------------------------------------------------------------------------------------------------------------------------------------------------|
| <b>Phosphatidic Acid (PA) (54)</b>        | -Structural component of cell membranes<br>-Helps mediate signaling through cell growth, proliferation, and reproduction pathways                                      |
| <b>Phosphatidylethanolamine (PE) (55)</b> | -Inner leaflet of plasma membrane                                                                                                                                      |
| <b>Phosphatidylglycerol (PG) (56)</b>     | -Cell membrane homeostasis                                                                                                                                             |
| <b>Phosphatidylinositol (PI) (34)</b>     | -Membrane structural lipid<br>-Substrate for lipid kinases that phosphorylate hydroxyl groups                                                                          |
| <b>Plasmalogen (PlsEtn) (57)</b>          | -Mediates vesicle fusion<br>-Component of lipid rafts                                                                                                                  |
| <b>Phosphatidylserine (PS) (39)</b>       | -Structural lipid-inner leaflet of plasma membrane<br>-Myelin membrane component<br>-Mediates signaling through Akt<br>-Signals apoptosis when on the membrane surface |
| <b>Lactosylceramide (LacCer) (58)</b>     | -Stabilizing structural membrane lipid                                                                                                                                 |
| <b>Sulfatides (ST) (27)</b>               | -Myelin, structural lipid<br>-Functional role in myelination                                                                                                           |
